# Supplementary material for: Graph theory and graph neural network assisted high-throughput crystal structure prediction and screening for energy conversion and storage
Source: Royal Society of Chemistry journal article supplement (doi:10.1039/d3ta06190f), 2024-01-01
Supplement: d3ta06190f2.xlsx [file d3ta06190f2.xlsx]

## Sheet: 647_predicted_stable_structures
MAGUS_ID	Formula	Space_group_symbol	Space_group_number	Formation_energy(eV/atom)	Predicted_LTC_log_value	Predicted_LTC_actual_value (W/mK)
1474182_88	Zn2SeS	'P6_3/mmc'	194	-0.64435	-0.955554	0.110776
314546_184	LiBi3	'Pm-3m'	221	-0.214491	-0.63771	0.230298
497800_158	BaPb2Au	'P4mm'	99	-0.339785	-0.600616	0.250833
516806_54	BaTlAu2	'C2/m'	12	-0.455841	-0.55062	0.281436
370860_33	BaTl2In	'P-1'	2	-0.306178	-0.42817	0.373104
497508_191	BaCdPb2	'P4/mmm'	123	-0.29108	-0.425264	0.375609
515403_178	BaCdAu2	'P-1'	2	-0.559589	-0.419064	0.381009
1544693_58	K2YInBr6	'P4/mmm'	123	-0.906387	-0.408578	0.390321
546887_138	LiBi2Sb	'P4/mmm'	123	-0.150027	-0.405741	0.392879
1728132_185	NaTl2BiBr6	'P-31m'	162	-0.997885	-0.36882	0.42774
543769_96	Sr2TlPd	'P-3m1'	164	-0.425894	-0.358314	0.438213
555382_143	NaCd2Hg	'P-1'	2	-0.101031	-0.348794	0.447925
417436_166	Ba2LiAu	'P-1'	2	-0.35969	-0.346586	0.450208
506204_111	CaAg2Au	'C2/m'	12	-0.354009	-0.32315	0.475171
313977_149	TlHg3	'Pm-3m'	221	-0.0330334	-0.304322	0.496224
484546_152	BaHgSb2	'P4mm'	99	-0.479372	-0.292068	0.510425
1105492_7	ZrTe	'Pm-3m'	221	0.0550509	-0.291707	0.510849
310741_200	Na3In	'C2/m'	12	-0.0339012	-0.287255	0.516114
1546842_101	Na2LiCoBr6	'P312'	149	-1.56803	-0.283201	0.520953
1428453_116	NaCa2TcO6	'P-3'	147	-1.63114	-0.278715	0.526362
309989_37	TlAu3	'Pm-3m'	221	0.104919	-0.263036	0.545713
418228_169	Ba2GaPt	'P-6m2'	187	-0.62229	-0.236395	0.580237
554473_29	KCd2Au	'P-3m1'	164	-0.193499	-0.232877	0.584956
499196_144	SrPdPb2	'C2/m'	12	-0.391404	-0.226836	0.593149
311950_75	Cd3Ge	'P4/mmm'	123	0.138741	-0.215837	0.608363
499515_125	LiBiPb2	'P4/mmm'	123	-0.192194	-0.210922	0.615287
309294_31	Cd3Ga	'Pm-3m'	221	0.040125	-0.205499	0.623018
1548987_90	K2YTlBr6	'P-3'	147	-1.67237	-0.205188	0.623465
364867_26	BaPt2Pb	'C2/m'	12	-0.478782	-0.199884	0.631125
311061_175	KAu3	'P6/mmm'	191	-0.208297	-0.196833	0.635576
53898_43	AgCl	'P6_3/mmc'	194	-0.878508	-0.194717	0.63868
311396_144	Ga3Hg	'Pm-3m'	221	0.0805512	-0.181453	0.658487
543881_124	Sr2AgHg	'P4/mmm'	123	-0.400354	-0.179689	0.661167
555781_107	NaMgCd2	'Pmmm'	47	-0.0582551	-0.176586	0.665908
928574_188	CaYAsO	'P-3m1'	164	-0.456027	-0.174092	0.669743
371638_107	CaTl2Hg	'P-1'	2	-0.249707	-0.162993	0.68708
516279_24	CdPbAu2	'P-6m2'	187	-0.10093	-0.15997	0.691878
514222_139	SrLiHg2	'P-1'	2	-0.404805	-0.158629	0.694019
497976_169	NaInPb2	'Pmmm'	47	-0.0934351	-0.150243	0.70755
554320_79	LiCd2Pb	'C2/m'	12	-0.127937	-0.149301	0.709087
1728126_12	K2TlBiCl6	'P-31m'	162	-1.98815	-0.146309	0.713988
1104711_112	HfAu	'Pm-3m'	221	-0.00630723	-0.12944	0.742266
336983_49	NaI	'P-6m2'	187	-1.20131	-0.118587	0.761051
499245_74	PdPb2Au	'P-3m1'	164	-0.175119	-0.114237	0.768711
505745_63	YAg2Sb	'P4/mmm'	123	-0.439471	-0.113301	0.770369
313153_91	Cd3Sn	'Pm-3m'	221	0.0376796	-0.112834	0.771198
1236871_105	BaI2	'Pn-3m'	224	-0.761683	-0.106191	0.783084
307954_37	CdGa3	'Pm-3m'	221	0.051062	-0.0997472	0.794791
505080_43	InAg2Au	'P4/mmm'	123	-0.0934281	-0.0970296	0.79978
1105754_163	HfBi	'P2/m'	10	0.0826279	-0.0833588	0.825356
1104258_153	MgAg	'Pm-3m'	221	0.0781628	-0.0771237	0.837291
314226_139	CdAu3	'Pm-3m'	221	-0.129145	-0.0749365	0.841518
94044_78	PbIF	'P4/nmm'	129	-1.83047	-0.0709442	0.84929
516956_62	CaMgAu2	'Pmmm'	47	-0.675826	-0.0671735	0.856696
396241_153	Mg2TlIn	'P2/m'	10	-0.0175874	-0.0656882	0.859631
395796_7	Mg2TlSb	'C2/m'	12	-0.0786636	-0.0618069	0.867347
311000_2	KZn3	'C2/m'	12	-0.0342689	-0.0604736	0.870014
454173_83	LiIn2Hg	'P4/mmm'	123	-0.138535	-0.0585256	0.873926
506365_97	KAg2Te	'P4mm'	99	-0.11651	-0.0541461	0.882783
485393_82	AgSb2Pd	'P-3m1'	164	-0.222318	-0.0533322	0.884439
366093_26	Na2InPb	'P4/mmm'	123	-0.0974994	-0.0465734	0.898311
498482_32	CaInPb2	'P4/mmm'	123	-0.313831	-0.0460855	0.89932
311871_96	Tl3F	'P-3m1'	164	-0.960864	-0.0387146	0.914714
548049_49	NaCdBi2	'P4/mmm'	123	-0.130528	-0.02843	0.936634
515335_122	InPbAu2	'P-6m2'	187	-0.0488003	-0.0237843	0.946707
454337_59	In2AgAu	'P-3m1'	164	-0.107806	-0.0213757	0.951972
312308_152	Ag3Pb	'P4/mmm'	123	0.0766406	-0.0153139	0.965353
553670_9	SrCd2Pt	'P4mm'	99	-0.357106	-0.0127133	0.971151
507177_5	NaAg2Au	'P-1'	2	-0.0914049	-0.0116489	0.973534
499388_64	SrAlPb2	'P4/mmm'	123	-0.183258	-0.0105975	0.975894
1106896_166	MgAu	'P4/mmm'	123	-0.0637071	-0.0025123	0.994232
308888_30	In3Pb	'Pm-3m'	221	0.0311541	0.0128309	1.02999
546287_12	CaTlBi2	'P4/mmm'	123	-0.471854	0.0152247	1.03568
311498_121	LiPb3	'Pm-3m'	221	-0.13392	0.0184262	1.04334
313887_118	SrZn3	'P6/mmm'	191	-0.0805643	0.0212811	1.05022
1239919_47	PSe2	'P-6m2'	187	-0.729944	0.0242768	1.05749
515350_138	NaAgAu2	'P2/m'	10	-0.156427	0.0266805	1.06336
1105763_89	ScPb	'Pm-3m'	221	-0.0725065	0.0306676	1.07317
308806_33	TlAg3	'P4/mmm'	123	0.0940711	0.0348098	1.08345
367147_105	Na2AsPd	'P-6m2'	187	-0.324662	0.038932	1.09379
468898_87	AsPd2Pb	'P4mm'	99	-0.192331	0.0444025	1.10765
555487_43	SrScCd2	'P4/mmm'	123	-0.187453	0.0653988	1.16252
310232_86	LiCa3	'Pm-3m'	221	0.0703153	0.0679352	1.16932
1105470_33	TlCd	'Pm-3m'	221	-0.229296	0.0719782	1.18026
555359_84	NaLiCd2	'P2/m'	10	-0.136381	0.0802796	1.20304
516343_110	LiAgAu2	'P2/m'	10	-0.304613	0.0827268	1.20984
1554792_20	RbLiTe	'P6_3mc'	186	-0.938053	0.0853878	1.21727
371322_34	YTl2In	'P4/mmm'	123	-0.280818	0.0885474	1.22616
1561087_1	CsLiTe	'Pmmn'	59	-0.655949	0.0893862	1.22853
548009_200	Bi2PdPt	'P-3m1'	164	-0.384066	0.0901913	1.23081
310198_138	Ag3Se	'Pm-3m'	221	0.00897047	0.090241	1.23095
463486_181	SbPd2Pb	'P-6m2'	187	-0.353967	0.0924789	1.23731
546511_30	Bi2PtAu	'P-3m1'	164	-0.274328	0.0931558	1.23924
468937_47	BiPd2Pt	'P4/mmm'	123	-0.20358	0.0939388	1.24148
516640_42	SnBiAu2	'P4/mmm'	123	-0.107246	0.0970429	1.25038
454850_67	BaIn2Pt	'P4mm'	99	-0.401051	0.0970527	1.25041
514587_82	Hg2PdAu	'P-3m1'	164	-0.0322709	0.101237	1.26252
363824_114	TlSnPt2	'Pm'	6	-0.342674	0.102287	1.26557
398306_98	YTlTe2	'P-3m1'	164	-1.04602	0.104946	1.27334
455034_156	In2HgAu	'P-6m2'	187	-0.0713376	0.105322	1.27445
313481_32	Al3Ge	'Pm-3m'	221	0.128742	0.106309	1.27735
1441277_51	MgSnAu	'C2/m'	12	-2.87092	0.112058	1.29437
310205_41	Mg3Tl	'Pm-3m'	221	0.00821664	0.116836	1.30869
1106177_156	TiBi	'Pm-3m'	221	-0.329518	0.117471	1.3106
314264_194	Ag3Ge	'Amm2'	38	0.113334	0.121612	1.32316
337476_88	InCl	'P-6m2'	187	-1.22331	0.13049	1.35049
545951_88	AgBi2Pt	'P-3m1'	164	-0.23657	0.13521	1.36524
515483_110	MgAgAu2	'P4/mmm'	123	-0.339303	0.13913	1.37762
1554833_74	RbNaO	'P2_1'	4	-1.84066	0.140426	1.38174
313545_175	InAg3	'Pm-3m'	221	-0.0390096	0.14384	1.39264
397572_175	LiGeTe2	'P4/mmm'	123	-0.293433	0.149076	1.40954
453343_147	YIn2Bi	'P4/mmm'	123	-0.412875	0.151615	1.4178
314599_166	MgAu3	'Pm-3m'	221	-0.380257	0.155337	1.43
453695_45	LiIn2Pb	'P-1'	2	-0.0985331	0.165657	1.46439
1441482_97	TiAsRh	'P6_3mc'	186	-0.212558	0.168888	1.47533
312224_189	ZnAg3	'Pm-3m'	221	-0.0291407	0.172659	1.48819
497332_6	SrZrPb2	'P2/m'	10	-0.246309	0.173011	1.4894
547617_2	ScTlBi2	'P4/mmm'	123	-0.346211	0.175911	1.49938
516042_46	InPtAu2	'P4/mmm'	123	-0.182277	0.177078	1.50341
558358_133	Zr2CuPd	'C2/m'	12	-0.236632	0.179103	1.51044
308378_145	CdIn3	'Pm'	6	0.0322541	0.18155	1.51897
310641_35	In3Au	'P-3m1'	164	-0.0839971	0.181849	1.52002
313362_93	Ca3Mg	'Pm-3m'	221	0.0191874	0.185815	1.53396
1441709_82	NaCrO2	'P6_3/mmc'	194	-1.97693	0.18587	1.53416
309675_57	YBi3	'Pm-3m'	221	-0.454504	0.186855	1.53764
547526_36	ScBi2Pb	'P4/mmm'	123	-0.280727	0.187279	1.53914
396986_52	SrBiTe2	'P-3m1'	164	-0.775126	0.194174	1.56378
454832_23	In2GaPd	'P3m1'	156	-0.225877	0.195827	1.56974
395399_88	SrMg2Au	'P4mm'	99	-0.308427	0.196071	1.57062
506223_133	LiAg2Hg	'P4/mmm'	123	-0.166284	0.199287	1.58229
515783_5	TiAgAu2	'Pmmm'	47	-0.209663	0.203615	1.59814
516816_119	InRhAu2	'P4/mmm'	123	-0.177818	0.208328	1.61558
498017_113	YMgPb2	'P-1'	2	-0.205828	0.210105	1.6222
558023_153	Zr2PbAu	'P4/mmm'	123	-0.248456	0.2105	1.62368
1104489_68	MgTl	'Pm-3m'	221	-0.319676	0.211898	1.62891
314883_137	AgAu3	'Pm-3m'	221	-0.0418536	0.215308	1.64175
312846_162	NaBi3	'Pm-3m'	221	-0.220458	0.215487	1.64243
467679_47	AlTlPd2	'P4/mmm'	123	-0.51609	0.216959	1.64801
1270650_14	NaLiSe	'Cm'	8	-2.27983	0.218982	1.6557
1052575_60	CaAlNO	'P-1'	2	-2.11001	0.222179	1.66793
515810_43	CdPdAu2	'P4/mmm'	123	-0.265159	0.222348	1.66858
313656_63	AlAg3	'Pm-3m'	221	-0.0500234	0.222773	1.67022
454575_137	ScIn2Pb	'P4/mmm'	123	-0.216028	0.223017	1.67116
516875_192	CdSnAu2	'P4/mmm'	123	-0.0978293	0.22376	1.67402
554184_81	Cd2PtAu	'P4/mmm'	123	-0.231554	0.225562	1.68098
310222_80	CaBi3	'Pm-3m'	221	-0.502178	0.225815	1.68196
311644_160	Cu3Au	'Pm-3m'	221	0.248386	0.228806	1.69358
314404_114	Zr3Bi	'Pm-3m'	221	-0.238407	0.241278	1.74292
1440232_30	SrCl2	'P6_3/mmc'	194	-1.48394	0.24288	1.74936
468717_174	SrAlPd2	'P-1'	2	-0.753655	0.242891	1.74941
517392_66	AlInAu2	'P-6m2'	187	-0.24459	0.248786	1.77332
1103750_190	CaCd	'Pmmm'	47	-0.0239101	0.252806	1.7898
309504_13	LiAu3	'Pm-3m'	221	-0.366241	0.253899	1.79431
555906_53	Zr2HgBi	'P-1'	2	-0.226553	0.25514	1.79945
398862_77	NaMgTe2	'P-3m1'	164	-0.658947	0.25598	1.80294
312557_153	Mg3Ga	'C2/m'	12	-0.0252336	0.25751	1.8093
493342_101	LiAgSn2	'P4/mmm'	123	-0.15902	0.257564	1.80952
420753_26	CaGaGe2	'P-6m2'	187	-0.103635	0.257761	1.81034
312610_45	CaIn3	'Pm-3m'	221	-0.313263	0.259749	1.81865
312463_32	Ag3Au	'Pm-3m'	221	-0.045323	0.264179	1.83729
1490674_77	PtF3	'P6_3/mmc'	194	-0.528944	0.265823	1.84426
1445362_52	SrCuAs	'P-6m2'	187	-0.746753	0.267804	1.8527
313161_167	YTl3	'Pm-3m'	221	-0.233741	0.269974	1.86198
1106759_71	BePd	'Pm-3m'	221	-0.511388	0.274584	1.88184
506825_52	Ag2HgPd	'P4/mmm'	123	-0.0906935	0.281587	1.91244
1238933_172	SbSe2	'Fm-3m'	225	-1.66869	0.286905	1.936
443270_12	Ca2GePt	'P-6m2'	187	-0.660283	0.291096	1.95477
313275_71	AlPb3	'Pm-3m'	221	0.169555	0.293296	1.9647
309038_91	Ca3Ag	'Pm-3m'	221	-0.046938	0.296527	1.97937
1283318_17	Li3NbO4	'P4/nmm'	129	-1.12345	0.296546	1.97946
452955_65	ScIn2Bi	'P2/m'	10	-0.208454	0.298041	1.98628
443142_28	NaCa2Ga	'P4/mmm'	123	-0.213743	0.302847	2.00838
397398_186	LiTe2Pb	'P-3m1'	164	-0.464971	0.305025	2.01848
308211_28	Mg3Ge	'P-1'	2	0.00138767	0.309172	2.03785
1106439_128	VP	'P-1'	2	-0.0414282	0.311558	2.04908
394466_57	Mg2CdIn	'P4/mmm'	123	-0.0505493	0.314747	2.06418
361416_78	YSc2Au	'P-1'	2	-0.419439	0.318315	2.08121
312635_19	Mg3Sb	'Pm-3m'	221	-0.126472	0.320412	2.09128
1104951_18	YRh	'Pm-3m'	221	-0.341648	0.323029	2.10392
557189_70	Zr2CdPb	'P4/mmm'	123	-0.0439271	0.327923	2.12776
1555835_9	CdHgSe2	'P-4m2'	115	-0.41431	0.331931	2.14749
364528_2	InSnPt2	'P-6m2'	187	-0.551997	0.335973	2.16757
516033_72	YRhAu2	'P4/mmm'	123	-0.650299	0.337103	2.17321
314810_34	Ca3Zn	'Pm-3m'	221	0.0158025	0.33971	2.1863
420976_94	CaAlGe2	'P-6m2'	187	-0.176833	0.339723	2.18637
364462_91	InNiPt2	'P4/mmm'	123	-0.24648	0.33977	2.18661
363921_13	GaPt2Au	'P2/m'	10	-0.358315	0.339927	2.18739
1473765_87	TlI	'P6_3/mmc'	194	-1.73274	0.343905	2.20752
1106828_18	ZrAu	'P-6m2'	187	0.0778989	0.344579	2.21095
545377_27	Sr2LiPd	'P-6m2'	187	-0.313899	0.346403	2.22026
364765_190	CuSnPt2	'P4/mmm'	123	-0.238348	0.347945	2.22815
364175_164	LiPt2Pb	'P4/mmm'	123	-0.375259	0.348282	2.22988
309975_191	BaSb3	'P6/mmm'	191	-0.37938	0.348542	2.23122
556666_105	Zr2AgHg	'P4/mmm'	123	-0.102504	0.349715	2.23725
380336_110	HfAs2Pt	'P-3m1'	164	-0.635087	0.350392	2.24074
1446362_60	KNaS	'P-6m2'	187	-0.50005	0.354686	2.26301
308622_170	Al3Hg	'Pm-3m'	221	0.172322	0.357028	2.27525
313117_3	ZnCu3	'Pm-3m'	221	0.216377	0.357855	2.27958
313402_35	Mg3Sn	'Pm-3m'	221	-0.0892374	0.363609	2.30998
410192_183	CaY2Pd	'Pmmm'	47	-0.371169	0.365703	2.32115
1446961_31	BaLiP	'P4/nmm'	129	-1.01868	0.366485	2.32533
468449_111	LiTlPd2	'P4/mmm'	123	-0.395646	0.369051	2.33911
395440_114	Mg2ZnIn	'P4/mmm'	123	-0.0417781	0.370559	2.34725
308954_98	Ni3Bi	'Pm-3m'	221	0.252279	0.37409	2.36641
1105649_77	ZrSe	'P4/mmm'	123	0.162981	0.378581	2.39101
1104452_128	CaAg	'Pm-3m'	221	-0.265759	0.379119	2.39397
313332_26	NaSb3	'P6/mmm'	191	-0.102116	0.380919	2.40391
310788_54	Al3Sn	'Pm-3m'	221	0.167678	0.381283	2.40593
498301_96	YScPb2	'P4/mmm'	123	-0.380715	0.384188	2.42208
1238921_88	SrI2	'Fm-3m'	225	-1.8091	0.394071	2.47782
1106253_158	ScTl	'P4/mmm'	123	0.0356641	0.394562	2.48063
394415_177	Mg2SbPb	'P-6m2'	187	-0.0750151	0.396434	2.49134
463270_167	Pd2PtPb	'P4/mmm'	123	-0.244985	0.398377	2.50252
898270_164	HfVPd2	'P-1'	2	-0.264592	0.398978	2.50598
482318_57	HfZn2Rh	'P4/mmm'	123	-0.377804	0.400202	2.51305
314723_86	Cu3Pt	'Pm-3m'	221	0.1399	0.400359	2.51396
308766_84	AlIn3	'Pm-3m'	221	0.144524	0.405322	2.54286
1647888_4	Sr2SeS	'P-1'	2	-2.10114	0.406232	2.54819
494130_102	Sn2PdAu	'P-3m1'	164	-0.355566	0.414072	2.59461
312493_118	AlCd3	'P-3m1'	164	0.0841958	0.415419	2.60267
1521730_13	KGaI2	'P6_322'	182	-1.81554	0.417207	2.61341
1105042_47	ZnPd	'P-6m2'	187	-0.359903	0.417654	2.6161
415328_173	Hf2AgAs	'P4/mmm'	123	-0.327233	0.418683	2.6223
309881_130	TlPt3	'Pm-3m'	221	-0.0191567	0.418728	2.62258
314533_154	NaAu3	'Pm-3m'	221	-0.1938	0.420428	2.63286
547081_7	SrBi2Rh	'P-1'	2	-0.494531	0.425942	2.6665
546960_150	NaScBi2	'P2/m'	10	-0.509952	0.426351	2.66902
554448_110	LiYCd2	'P2/m'	10	-0.278683	0.428774	2.68395
556451_176	Zr2SbPb	'P4mm'	99	-0.265616	0.431512	2.70092
416334_200	Hf2AgTe	'P4mm'	99	-0.208626	0.437944	2.74122
364185_199	CaPdPt2	'P4/mmm'	123	-0.563867	0.441334	2.7627
395989_51	Mg2PbAu	'P4/mmm'	123	-0.308316	0.443699	2.77779
514973_144	LiZrHg2	'P4/mmm'	123	-0.246345	0.448798	2.8106
1440229_35	NaBr	'P6_3/mmc'	194	-2.24282	0.448923	2.8114
528584_194	HfNi2Sb	'P-6m2'	187	-0.3597	0.457372	2.86663
313419_132	Sr3Ir	'Pm-3m'	221	0.000208002	0.458915	2.87684
379566_77	ZrAs2Pd	'P-3m1'	164	-0.702822	0.461931	2.89688
516745_108	NaPtAu2	'P2/m'	10	-0.0962747	0.463766	2.90915
365212_20	LiTlPt2	'Pmmm'	47	-0.342404	0.467192	2.93219
364868_181	MgHgPt2	'P4/mmm'	123	-0.451897	0.469147	2.94542
1105274_48	HfSe	'Cmmm'	65	-0.411484	0.48388	3.04705
379347_193	CaBiAs2	'P-1'	2	-0.463512	0.483894	3.04715
556967_175	Zr2AgPd	'P2/m'	10	-0.302009	0.484639	3.05238
311711_118	LiAg3	'Pm-3m'	221	-0.150892	0.485865	3.06101
309657_133	Al3Sb	'Pm-3m'	221	0.199393	0.486232	3.0636
446631_108	Li2SnPt	'Pmmm'	47	-0.547542	0.487637	3.07353
314566_38	CdAg3	'Pm-3m'	221	-0.0547539	0.489421	3.08618
1455393_50	LiCaSb	'P2_1/m'	11	-1.0394	0.49141	3.10035
409326_88	Y2TlGa	'Pmmm'	47	-0.474366	0.494746	3.12425
312815_154	Ni3Pd	'Pm-3m'	221	0.232921	0.497736	3.14584
556554_178	Zr2TlPd	'Pmmm'	47	-0.323321	0.499503	3.15866
504797_3	MgAg2Pd	'P4/mmm'	123	-0.334129	0.503266	3.18615
558098_183	Zr2TlHg	'P2/m'	10	-0.131879	0.506366	3.20897
1448353_21	LiCaAs	'C2'	5	-0.778153	0.506499	3.20996
511373_102	LiAl2Zn	'P4/mmm'	123	-0.109647	0.506559	3.2104
1554866_45	RbLiS	'P-6m2'	187	-0.996258	0.507225	3.21533
394443_155	LiMg2Sn	'P-1'	2	-0.167301	0.508376	3.22386
557954_186	Zr2HgPd	'P4/mmm'	123	-0.363152	0.514063	3.26635
313247_90	LiIn3	'P2/m'	10	-0.103633	0.515915	3.28031
308064_41	TaAu3	'P4/mmm'	123	-0.0554896	0.515964	3.28068
395078_142	LiMg2Sb	'P3m1'	156	-0.157385	0.516109	3.28178
410006_155	Y2AlCu	'P2/m'	10	-0.23167	0.521488	3.32268
312350_181	SnPt3	'Pm-3m'	221	-0.387184	0.522827	3.33293
310468_149	InPt3	'Pm-3m'	221	-0.364561	0.52304	3.33457
1487217_55	RbCuSe	'P3m1'	156	-0.743174	0.523312	3.33666
314157_46	RhAu3	'P-3m1'	164	0.138769	0.52426	3.34395
506911_94	Ag2PdAu	'P4/mmm'	123	-0.0951	0.53413	3.42082
314172_123	AlCu3	'Pm-3m'	221	0.106069	0.536398	3.43873
397637_46	LiSbTe2	'P3m1'	156	-0.431314	0.537747	3.44942
1106814_128	SrCa	'Pm-3m'	221	-0.098477	0.542349	3.48618
379668_166	YCdAs2	'P-3m1'	164	-0.626436	0.543301	3.49382
309755_135	TlPd3	'P4/mmm'	123	-0.191807	0.54695	3.5233
365621_186	MgPt2Au	'P4/mmm'	123	-0.511948	0.55075	3.55427
749089_195	YScO3	'Pmmm'	47	0.175476	0.551448	3.55998
492686_49	ScTiSn2	'P4/mmm'	123	-0.30419	0.552816	3.57122
505587_176	CdAg2Pd	'P4/mmm'	123	-0.187454	0.562355	3.65052
494027_42	LiMgSn2	'P4/mmm'	123	-0.211907	0.565118	3.67382
1455693_52	NaMgN	'P4/nmm'	129	-0.917423	0.565369	3.67594
308939_100	Pd3Pb	'Pm-3m'	221	-0.307027	0.566216	3.68312
311420_144	ZrNi3	'Pm-3m'	221	-0.268762	0.569911	3.71459
312079_123	MgCu3	'Pm-3m'	221	0.234736	0.571784	3.73065
1106149_123	MgZn	'Pm-3m'	221	-0.254714	0.572998	3.74109
1407942_6	LiMgBi	'P-31m'	162	-3.96559	0.574706	3.75583
528332_167	HfNi2Rh	'P4/mmm'	123	-0.503316	0.576938	3.77518
410146_198	Y2SiPb	'P4/mmm'	123	-0.353907	0.576978	3.77553
313580_48	Li3Mg	'Pmmm'	47	-0.0187985	0.580099	3.80276
443882_23	Ca2SiPd	'Amm2'	38	-0.62085	0.583583	3.83339
1106537_72	LiPd	'Pm-3m'	221	-0.905076	0.584329	3.83998
486180_178	ScSb2Pb	'P-3m1'	164	-0.343502	0.586368	3.85805
517237_152	HfScAu2	'P4/mmm'	123	-0.612728	0.587613	3.86913
411212_117	Y2BiSb	'P4mm'	99	-0.79351	0.591172	3.90097
450939_128	YRh2Au	'P4/mmm'	123	-0.515317	0.59177	3.90634
497645_76	CaHfPb2	'P4/mmm'	123	-0.184863	0.591787	3.9065
1052006_56	BaGeTeO	'Cm'	8	-1.19302	0.594845	3.93409
1443484_69	SrAsPt	'F-43m'	216	-0.525161	0.596108	3.94556
314512_18	Al3In	'Pm-3m'	221	0.168631	0.59749	3.95813
311765_44	ScIn3	'Pm-3m'	221	-0.288566	0.598382	3.96627
556722_95	Zr2CdPd	'Pmmm'	47	-0.332452	0.604278	4.02048
313036_127	ZnPt3	'P-1'	2	-0.203468	0.606395	4.04012
313873_43	CaPb3	'Pm-3m'	221	-0.328282	0.614475	4.116
1106693_118	YGa	'Pm-3m'	221	-0.44195	0.617799	4.14762
312193_10	VPt3	'Pm-3m'	221	-0.345538	0.619304	4.16202
515081_128	AlRhAu2	'Pmm2'	25	-0.374619	0.620054	4.16921
310176_60	NbPt3	'Pm-3m'	221	-0.501263	0.622489	4.19265
363830_162	LiCdPt2	'P4/mmm'	123	-0.45459	0.622975	4.19735
493623_182	NiSn2Pt	'P-3m1'	164	-0.391164	0.624544	4.21254
314495_18	Cd3Rh	'P4/mmm'	123	-0.0353121	0.624823	4.21525
1239175_69	MoN2	'P6_3mc'	186	-0.146554	0.625566	4.22247
362890_184	Sc2NiBi	'P4/mmm'	123	-0.386416	0.625982	4.22651
463574_45	HfNiPd2	'P4/mmm'	123	-0.672951	0.626134	4.22799
420905_5	YAlGe2	'P-6m2'	187	-0.303585	0.628028	4.24647
1414009_39	LiMgP	'P4_2/mmc'	131	-0.419667	0.628768	4.25371
395257_144	Mg2SnAu	'P4/mmm'	123	-0.334319	0.629019	4.25617
308809_30	Mg3Hg	'P2/m'	10	-0.0671259	0.630743	4.2731
557928_157	MgZr2Pt	'C2/m'	12	-0.433395	0.6316	4.28154
362877_4	Sc2TeAu	'P-1'	2	-0.869711	0.635377	4.31894
1106942_145	TiS	'Pm-3m'	221	-0.805382	0.635406	4.31923
486527_21	NaHfSb2	'P-3m1'	164	-0.361181	0.637615	4.34125
562397_93	Ti2InRh	'P4/mmm'	123	-0.192921	0.644731	4.41297
505144_3	AlAg2Pd	'P3m1'	156	-0.238516	0.64579	4.42374
467701_83	ZnPd2Au	'Pmmm'	47	-0.376098	0.64819	4.44826
314547_30	AgPt3	'P4/mmm'	123	0.0246308	0.650232	4.46922
380673_12	ScAs2Pd	'P-3m1'	164	-0.725522	0.651079	4.47795
308783_177	CdPt3	'Pm-3m'	221	-0.182726	0.65221	4.48963
308956_5	MoPt3	'Pm-3m'	221	-0.107521	0.655714	4.526
395163_187	Mg2SbAu	'P-3m1'	164	-0.31653	0.656586	4.53509
732558_24	Zn3Ni	'Pm-3m'	221	-0.0404198	0.657062	4.54007
715942_196	MnZn3	'Pm-3m'	221	-0.0404198	0.657062	4.54007
486592_71	YGaSb2	'P-3m1'	164	-0.452358	0.657818	4.54797
310841_136	Zn3Co	'Pm-3m'	221	-0.0404152	0.657959	4.54946
1103970_69	ZrRh	'Pm-3m'	221	-0.35526	0.658872	4.55903
310967_16	CaSn3	'P6/mmm'	191	-0.289057	0.660071	4.57163
313682_176	Ni3Ir	'Pm-3m'	221	0.197223	0.661002	4.58144
557145_159	Zr2GaHg	'Pmmm'	47	-0.342391	0.662892	4.60143
364016_35	CdPdPt2	'P4/mmm'	123	-0.205741	0.663564	4.60855
416611_76	Hf2CdAu	'P-1'	2	-0.198191	0.665671	4.63096
492162_127	CaTiSn2	'P4/mmm'	123	-0.324298	0.666992	4.64506
363218_73	MgPdPt2	'C2/m'	12	-0.492215	0.672765	4.70722
555928_136	Zr2ZnSb	'P4/mmm'	123	-0.378589	0.677926	4.7635
309884_97	CrPt3	'Pm-3m'	221	-0.0237672	0.681869	4.80694
394247_168	Mg2PdPb	'P4/mmm'	123	-0.376222	0.682047	4.80891
561269_122	Ti2AlPd	'P-1'	2	-0.200098	0.682697	4.81612
464075_199	SnIrPd2	'P4/mmm'	123	-0.229944	0.683859	4.82902
733537_179	MnZn3	'Pm-3m'	221	-0.102898	0.684782	4.83929
715918_62	Zn3Co	'Pm-3m'	221	-0.102859	0.684983	4.84154
312848_184	Zn3Ni	'Pm-3m'	221	-0.101559	0.685087	4.84269
463274_88	AlPd2Au	'P4/mmm'	123	-0.619434	0.685259	4.84461
310844_177	MgPt3	'Pm-3m'	221	-0.582435	0.688236	4.87793
555962_163	Zr2InPd	'P4/mmm'	123	-0.454894	0.688525	4.88118
363974_72	YPt2Au	'P4/mmm'	123	-0.891818	0.689617	4.89347
1468491_25	Sc2Te3	'Pmn2_1'	31	-2.03045	0.691744	4.91749
488190_24	TaNb2Al	'P4/mmm'	123	-0.142794	0.692524	4.92633
450657_16	BiPdRh2	'P2/m'	10	-0.0670919	0.694146	4.94477
558362_117	Zr2AsPb	'P4/mmm'	123	-0.531649	0.695449	4.95963
310993_12	Mg3Al	'Pmmm'	47	0.0649453	0.697603	4.98429
364087_158	ScNiPt2	'P4/mmm'	123	-0.83672	0.699094	5.00143
1241396_44	Ca2SO	'P4_2/mcm'	132	0.164452	0.69959	5.00715
1106151_84	SrCd	'Pm-3m'	221	-0.0474853	0.70063	5.01915
1104770_45	TiPd	'Pm-3m'	221	-0.422531	0.700986	5.02326
32-YHPd2-227-9769004_1_189	YHPd2	'P4/nmm'	129	-1.30451	0.703663	5.05433
545947_105	CaNiBi2	'P-3m1'	164	-0.328608	0.704382	5.0627
363029_116	ZrSc2Au	'P4/mmm'	123	-0.402184	0.704543	5.06458
1433303_75	Li2O	'P312'	149	-3.53562	0.704778	5.06732
1106703_193	YHg	'Pm-3m'	221	-0.600269	0.705265	5.07301
311310_153	Ca3Y	'P4/mmm'	123	0.130977	0.706161	5.08348
1106305_61	GaRh	'Pm-3m'	221	-0.28879	0.709533	5.1231
310220_82	HfNi3	'Pm-3m'	221	-0.362559	0.711926	5.15141
365457_185	LiPdPt2	'P-1'	2	-0.37523	0.712232	5.15504
312884_161	Pd3Au	'Pm-3m'	221	-0.0605493	0.718041	5.22445
379076_50	HfAs2Rh	'P-3m1'	164	-0.674893	0.718294	5.2275
308687_7	InPd3	'Pm-3m'	221	-0.436384	0.728908	5.35683
364275_178	ZnCrPt2	'Pmm2'	25	-0.182526	0.729879	5.36882
468748_191	InIrPd2	'P4/mmm'	123	-0.138306	0.730309	5.37414
468884_96	ScPd2Au	'P4/mmm'	123	-0.838963	0.731184	5.38498
394305_200	Mg2SbRh	'P-3m1'	164	-0.341396	0.7317	5.39138
363642_186	MoPdPt2	'P4/mmm'	123	-0.06504	0.732713	5.40397
463582_58	SnPd2Rh	'P4/mmm'	123	-0.359969	0.73327	5.41091
484557_176	ScBiSb2	'P-3m1'	164	-0.38706	0.735108	5.43386
313102_65	Mg3Zn	'P4/mmm'	123	0.0153565	0.739647	5.49094
328549_9	CrC	'P-6m2'	187	0.0670162	0.739733	5.49203
313340_65	Zr3Sc	'P4/mmm'	123	0.0229509	0.740117	5.49689
562125_162	Ti2SnAu	'P-1'	2	-0.278803	0.74117	5.51024
1270414_81	SrCdSeO	'R-3m'	166	-3.03077	0.742898	5.5322
312328_174	MgPd3	'Pm-3m'	221	-0.475619	0.743938	5.54546
364569_149	NbPdPt2	'Pm'	6	-0.449111	0.750857	5.63451
1106271_20	ScAg	'Pm-3m'	221	-0.250607	0.751286	5.64009
1106907_96	ScAu	'Pm-3m'	221	-0.585471	0.760624	5.76268
450887_157	GaRh2Au	'P4/mmm'	123	-0.246384	0.76159	5.77551
314361_169	Pd3Pt	'Pm-3m'	221	-0.0267182	0.761991	5.78085
310344_63	TiPd3	'Pm-3m'	221	-0.595331	0.7635	5.80096
558164_85	Zr2RhAu	'P4/mmm'	123	-0.583709	0.76756	5.85544
463907_48	GaIrPd2	'P4mm'	99	-0.24506	0.769393	5.88022
411021_132	Y2InRh	'Pmmm'	47	-0.65115	0.770018	5.88868
308086_190	TiNi3	'Pm-3m'	221	-0.271954	0.770229	5.89154
561659_149	Ti2CdPd	'P4/mmm'	123	-0.093394	0.775216	5.95959
310978_92	Ti3Bi	'Pmmm'	47	-0.0344767	0.775569	5.96444
363572_143	AlPdPt2	'P4/mmm'	123	-0.655111	0.776205	5.97318
380389_168	ScAs2Pb	'P-3m1'	164	-0.509403	0.77628	5.97421
310429_178	TiPt3	'Pm-3m'	221	-0.807282	0.778703	6.00763
450745_52	InGaRh2	'P4/mmm'	123	-0.513638	0.780117	6.02722
1106862_44	CdAg	'Pm-3m'	221	-0.455786	0.780827	6.03708
365679_94	TiPt2Rh	'P4/mmm'	123	-0.769513	0.782919	6.06623
1414094_72	Rb2YInBr6	'P4/nmm'	129	-0.661273	0.783013	6.06755
1027018_63	MgCdSeO	'Pmn2_1'	31	-2.49386	0.78491	6.0941
312666_45	HgRh3	'Pm-3m'	221	0.279647	0.784942	6.09455
396354_116	Mg2TePt	'P-3m1'	164	-0.616226	0.785395	6.10092
312295_33	CaAl3	'Pm-3m'	221	-0.146037	0.788973	6.15139
409480_44	Y2NiTe	'P-1'	2	-0.746963	0.791173	6.18263
309468_53	Rh3Pb	'Pm-3m'	221	0.130733	0.792266	6.1982
556020_129	Zr2TlGa	'P4/mmm'	123	-0.316589	0.792911	6.20742
715966_192	Zn3Fe	'Pm-3m'	221	0.147933	0.800531	6.31729
748228_155	Zn3Tc	'Pm-3m'	221	0.147934	0.800635	6.3188
314047_162	MnZn3	'Pm-3m'	221	0.14988	0.800667	6.31927
510146_192	Al2AgRh	'P4/mmm'	123	-0.533748	0.801921	6.33754
468253_96	InPd2Rh	'P4/mmm'	123	-0.261931	0.802014	6.3389
314663_194	TcPt3	'Pm-3m'	221	0.00266976	0.809632	6.45107
468466_94	MgPd2Pt	'P-1'	2	-0.446924	0.811499	6.47886
748889_153	BeZn3	'P-6m2'	187	0.0666521	0.811613	6.48057
363125_14	Sc2NbAl	'P4/mmm'	123	-0.159811	0.813168	6.50381
520590_22	ScVGa2	'P2/m'	10	-0.280451	0.816539	6.55449
458478_14	HfNiIr2	'P4/mmm'	123	-0.64439	0.817609	6.57065
557227_118	Zr2InSn	'P4/mmm'	123	-0.353347	0.820552	6.61534
434775_196	HfTaGe2	'Pmmm'	47	-0.130222	0.821645	6.63201
1105136_135	TiSn	'Pm-3m'	221	-0.561957	0.821725	6.63322
450458_29	ZrAsRh2	'P4mm'	99	-0.595634	0.822981	6.65243
485871_69	SrHfSb2	'P-3m1'	164	-0.701434	0.82556	6.69207
443807_147	Ca2AlIr	'P-6m2'	187	-0.442088	0.826592	6.70798
1441739_29	NaCrO2	'R-3m'	166	-2.82071	0.830268	6.765
310883_60	Ag3Pd	'Pm-3m'	221	-0.0594268	0.833128	6.8097
561823_181	Ti2CdIr	'Pmmm'	47	-0.155154	0.83908	6.90367
557049_20	Zr2VSb	'Pmmm'	47	-0.218164	0.841363	6.94006
420550_23	ZrGe2Mo	'P4/mmm'	123	-0.181095	0.844036	6.9829
1442008_34	CdS	'R-3m'	166	-2.82016	0.844708	6.99372
1441568_56	BaS	'P4/nmm'	129	-0.743654	0.849396	7.06962
1106331_26	LiMg	'Pm-3m'	221	-0.654509	0.85144	7.10297
313947_90	TlRh3	'Pm-3m'	221	0.226172	0.851907	7.11062
556148_172	Zr2AlHg	'Pmmm'	47	-0.335026	0.852256	7.11634
1472864_11	MgF2	'P6_3/mcm'	193	-1.19802	0.853469	7.13623
308297_5	CuRh3	'C2/m'	12	0.187708	0.856054	7.17884
1104779_166	YAg	'P4/mmm'	123	-0.455799	0.861546	7.27019
1554836_87	NaLi3O2	'Cm'	8	-2.45874	0.861619	7.27141
1104257_9	CdGa	'Pm-3m'	221	-0.373659	0.861681	7.27246
309899_123	Pt3Rh	'Pm-3m'	221	0.00357505	0.861802	7.27447
312158_106	TiAl3	'C2/m'	12	-0.360271	0.86575	7.34091
309860_145	MnAl3	'Pm-3m'	221	0.00645805	0.867308	7.36729
484634_43	ScSnSb2	'P-3m1'	164	-0.33465	0.868749	7.39178
310690_11	CdPd3	'Pm-3m'	221	-0.24994	0.8703	7.41823
313822_181	ScPd3	'Pm-3m'	221	-0.859707	0.871077	7.43151
364492_27	ZrCoPt2	'P4/mmm'	123	-0.742444	0.876911	7.53201
458730_139	ScNiIr2	'P-1'	2	-0.328643	0.87971	7.58071
365526_153	MgPt2Rh	'P4/mmm'	123	-0.457369	0.881429	7.61078
445434_56	Li2AlPd	'P4/mmm'	123	-0.469943	0.881474	7.61157
1088995_66	CaScPO	'Pmn2_1'	31	-2.71989	0.881477	7.61162
365647_192	ScPt2Au	'P4/mmm'	123	-0.917272	0.882504	7.62965
308467_121	YPd3	'Pm-3m'	221	-0.865267	0.882933	7.63718
378811_14	ZrAs2Rh	'P-3m1'	164	-0.742674	0.887479	7.71754
511601_6	ScAl2Cd	'P4/mmm'	123	-0.331494	0.887952	7.72594
899114_86	BaPdPb2	'P4/mmm'	123	-0.347657	0.890599	7.77318
311493_200	Ti3Ge	'Pm-3m'	221	-0.269236	0.895024	7.85278
485217_151	CaTcSb2	'P-3m1'	164	-0.242544	0.896541	7.88026
468518_198	TiVPd2	'P4/mmm'	123	-0.27466	0.897891	7.90481
310280_46	TaNi3	'Pm-3m'	221	-0.0418525	0.904544	8.02683
556905_125	Zr2CdTc	'Pmmm'	47	-0.276515	0.906691	8.06662
302869_193	YBe3	'P-1'	2	-0.083962	0.907438	8.08049
309760_163	Sc3In	'Pmmm'	47	-0.22254	0.908173	8.09418
362341_87	Sc2CuTc	'P4/mmm'	123	-0.172012	0.911476	8.15597
419523_142	HfGe2Ru	'P4mm'	99	-0.261424	0.912087	8.16745
364366_161	MgTcPt2	'P-1'	2	-0.337172	0.913179	8.18803
484869_175	CaHfSb2	'P-1'	2	-0.725149	0.913902	8.20167
308011_26	AgPd3	'Pm-3m'	221	-0.0304513	0.919904	8.31581
561073_143	Ti2InPd	'P4/mmm'	123	-0.247514	0.920143	8.32038
311388_34	BeAg3	'P4/mmm'	123	0.0767641	0.923246	8.38004
563115_31	Ti2AlIn	'Cmmm'	65	-0.392775	0.9233	8.38109
314884_94	YPt3	'Pm-3m'	221	-0.981301	0.924486	8.404
22176_70	SrCaO2	'R-3m'	166	-4.06904	0.925081	8.41553
314294_109	YTi3	'Pmmm'	47	0.242163	0.925524	8.42412
362424_155	Sc2RuPb	'Pmmm'	47	-0.500614	0.926452	8.44213
363252_163	TaPt2Au	'P2/m'	10	-0.445709	0.926741	8.44775
365337_88	ScPdPt2	'P4/mmm'	123	-0.989026	0.931308	8.53705
308890_145	TaPt3	'Pm-3m'	221	-0.540378	0.932245	8.5555
1105212_199	LiSb	'Pm-3m'	221	0.00548866	0.934063	8.59138
361363_69	Sc2RhPb	'P-1'	2	-0.639556	0.93497	8.60933
308099_49	GaIr3	'P4/mmm'	123	-0.0388968	0.935704	8.62391
1710474_87	CaZrO3	'P-1'	2	-4.70657	0.93672	8.6441
314838_49	BiRh3	'Pm-3m'	221	-0.00782941	0.939197	8.69356
557203_10	Zr2TaAl	'P4/mmm'	123	-0.107343	0.939614	8.70189
414883_65	Hf2TcMo	'P4/mmm'	123	-0.219889	0.945842	8.82759
310277_91	AlIr3	'Pm-3m'	221	-0.335765	0.948394	8.87961
416658_37	Hf2GaAs	'P4/mmm'	123	-0.457546	0.95169	8.94725
309498_103	IrPd3	'P-6m2'	187	0.0662293	0.953852	8.9919
485150_123	CaSb2Ru	'P-3m1'	164	-0.400379	0.962595	9.17477
460224_56	ZrIr2Au	'P4/mmm'	123	-0.524962	0.967151	9.27152
312055_122	InRh3	'Pm-3m'	221	-0.0734879	0.971783	9.37094
13755_58	YOF	'P4/nmm'	129	-4.98689	0.97282	9.39333
468138_81	ScTaPd2	'Pmmm'	47	-0.488356	0.976496	9.47319
561625_120	Ti2TlPd	'P4/mmm'	123	-0.154848	0.977366	9.49217
309716_82	SnRh3	'Pm-3m'	221	-0.192521	0.977398	9.49288
468761_142	MgPd2Rh	'P4/mmm'	123	-0.305249	0.980593	9.56298
361646_197	Sc2CdTc	'P4/mmm'	123	-0.311411	0.981158	9.57543
416585_102	Hf2ZnTc	'P4/mmm'	123	-0.414646	0.981862	9.59097
511089_74	LiTiAl2	'Pmmm'	47	-0.189233	0.987841	9.7239
313542_173	MoPd3	'Pm-3m'	221	0.0915554	0.993239	9.84552
463038_2	BePd2Au	'P4/mmm'	123	-0.412819	0.994739	9.8796
365365_52	ZrIrPt2	'P4/mmm'	123	-0.89732	0.999581	9.99035
361553_139	Sc2CdIr	'P4/mmm'	123	-0.673981	1.00128	10.0296
363295_98	HfRuPt2	'P4/mmm'	123	-0.822516	1.00184	10.0425
410547_88	Y2TlAs	'Pm'	6	-0.819663	1.00286	10.066
312530_36	NbNi3	'Pm-3m'	221	0.0241869	1.00488	10.113
309619_17	Zn3Fe	'Pm-3m'	221	0.105476	1.0094	10.2188
715990_82	Zn3Co	'Pm-3m'	221	0.105476	1.0094	10.2188
359983_53	Ca2Al2O5	'Cm'	8	-4.38276	1.01049	10.2445
1103642_188	MgPb	'Pm-3m'	221	0.0902094	1.01119	10.2611
311274_53	ZnRh3	'Pm-3m'	221	-0.0600369	1.01268	10.2962
310830_1	YRh3	'Pm-3m'	221	-0.418435	1.01406	10.3291
458705_56	TiIr2Pd	'P4/mmm'	123	-0.565117	1.02066	10.4872
362651_151	Sc2CoPb	'P-1'	2	-0.327497	1.02193	10.518
414900_165	Hf2InGa	'P4/mmm'	123	-0.286663	1.02199	10.5193
313365_74	LiTl3	'P2/m'	10	-0.0795109	1.02339	10.5533
309223_73	TaPd3	'Pm-3m'	221	-0.314456	1.02699	10.6412
416255_101	Hf2AlV	'P2/m'	10	-0.10838	1.02773	10.6594
450494_147	AlRh2Au	'P4/mmm'	123	-0.428015	1.03045	10.7263
309421_165	Nb3Al	'P4/mmm'	123	-0.155601	1.03825	10.9207
311671_106	ZrSc3	'P-6m2'	187	0.000132961	1.04074	10.9835
314573_69	Pd3Ru	'Pm'	6	0.100725	1.0411	10.9925
562028_194	Ti2ZnPd	'P4/mmm'	123	-0.321764	1.04147	11.0019
310373_80	OsPd3	'P-6m2'	187	0.125057	1.04211	11.0183
309499_55	NbPd3	'Pm-3m'	221	-0.281304	1.04398	11.0657
313911_168	HfPd3	'Pm-3m'	221	-0.875068	1.04806	11.1702
1091126_22	MgPd	'P4/nmm'	129	-2.77348	1.04824	11.1747
361280_189	Sc2SnRh	'P4/mmm'	123	-0.751771	1.05018	11.2248
312951_65	ScPt3	'Pm-3m'	221	-1.05212	1.05035	11.2292
468235_52	HfPd2Pt	'P4/mmm'	123	-0.964718	1.05301	11.2981
314692_35	CdRh3	'P4/mmm'	123	0.0527895	1.05429	11.3316
562026_31	Ti2AgIr	'Pmmm'	47	-0.239059	1.05926	11.462
463240_154	ZrPd2Pt	'P4/mmm'	123	-0.893818	1.06042	11.4927
308585_6	Ti3Tl	'Pm-3m'	221	0.121577	1.06223	11.5406
458684_172	TaNiIr2	'P4/mmm'	123	-0.483133	1.06251	11.5481
557887_58	Zr2GaRh	'P4/mmm'	123	-0.572824	1.07065	11.7665
563399_141	YAlO3	'Pmmm'	47	-0.188074	1.07114	11.7798
561380_78	Ti2BeMo	'Pmmm'	47	-0.403184	1.07178	11.7973
313551_58	Nb3Bi	'P2/m'	10	0.203558	1.07528	11.8927
308787_141	ZrPt3	'Pm-3m'	221	-1.02073	1.07535	11.8946
1104094_84	ScZn	'Pm-3m'	221	-0.0541623	1.07955	12.0102
562823_47	Ti2GePd	'P4/mmm'	123	-0.333944	1.08102	12.051
557720_59	Zr2InRh	'P4/mmm'	123	-0.472388	1.08292	12.1038
468772_64	HfIrPd2	'P-1'	2	-0.650308	1.08338	12.1166
1105355_200	LiAg	'P-6m2'	187	-1.18211	1.08414	12.1378
1105027_132	InPt	'P4/mmm'	123	-0.796982	1.08509	12.1644
458697_126	HfIr2Au	'P4/mmm'	123	-0.599191	1.08725	12.2251
451647_134	AlCdRh2	'P4/mmm'	123	-0.594066	1.09228	12.3674
1332607_100	BaCa2WO6	'P-43m'	215	-3.56256	1.09537	12.4556
1105672_72	AgPb	'P-6m2'	187	-1.35117	1.09708	12.505
363838_50	BeNbPt2	'P4/mmm'	123	-0.732707	1.09744	12.5152
415342_64	Hf2AlSn	'P-1'	2	-0.278376	1.10002	12.5897
327216_117	TiSe	'P-6m2'	187	-1.06426	1.10187	12.6437
1440137_13	LiCl	'Fm-3m'	225	-2.51561	1.10404	12.7071
312677_151	Ti3Si	'Pm-3m'	221	-0.330708	1.10515	12.7394
312686_111	LiMg3	'P2/m'	10	0.0138409	1.10525	12.7424
309184_37	LiTi3	'P-3m1'	164	0.239731	1.11434	13.0118
416068_12	Hf2InTc	'P4/mmm'	123	-0.382709	1.11492	13.0292
678647_58	Zn3Ni	'Ama2'	40	-4.74481	1.1163	13.0707
551243_109	YZrTc2	'P2/m'	10	-0.0619875	1.11668	13.0821
827389_18	BePd2Pb	'Cm'	8	-4.98806	1.12467	13.325
1060237_26	CaScPO	'P2_1/m'	11	-3.96834	1.12911	13.4622
561913_128	Ti2AlSn	'P4/mmm'	123	-0.33461	1.13416	13.6193
308959_100	Ta3Pt	'P4/mmm'	123	-0.299951	1.13829	13.7496
312770_179	Co3Ir	'Pmmm'	47	0.134371	1.13971	13.7947
555982_3	MgZr2Si	'P4/mmm'	123	-0.278495	1.146	13.996
311062_95	LiRh3	'P-1'	2	-0.0320604	1.15139	14.1707
312088_200	YAl3	'Pm-3m'	221	-0.419984	1.15283	14.2178
313452_156	LiY3	'C2/m'	12	0.0667103	1.16724	14.6975
379155_177	YBiAs2	'P-3m1'	164	-0.661606	1.16841	14.7369
459330_62	TiAlIr2	'P4/mmm'	123	-0.857447	1.17079	14.8181
415801_100	Hf2AlCd	'P4/mmm'	123	-0.193873	1.17145	14.8405
311116_189	Hf3Cr	'Pmmm'	47	0.167179	1.17335	14.9056
1104341_195	LiCd	'Pm-3m'	221	-0.820478	1.17419	14.9344
361810_12	MgSc2Tc	'P4/mmm'	123	-0.187867	1.17715	15.0365
310770_60	HfAl3	'Pm-3m'	221	-0.364921	1.17986	15.1308
363878_103	BeVPt2	'P4/mmm'	123	-0.630227	1.18482	15.3046
365537_109	HfIrPt2	'P4/mmm'	123	-0.980147	1.18537	15.324
555980_68	Zr2AlRh	'P2/m'	10	-0.532287	1.18633	15.3578
308827_3	ZnCo3	'P4/mmm'	123	0.128145	1.18779	15.4095
1105561_114	TaN	'Pm-3m'	221	-0.761564	1.19687	15.7351
458818_182	MgCrIr2	'Pmmm'	47	-0.226776	1.19896	15.8111
556971_146	Zr2TcRh	'P4/mmm'	123	-0.623106	1.20181	15.9152
311706_119	MgIr3	'Pm-3m'	221	-0.115376	1.20242	15.9375
379675_24	YSnAs2	'P-3m1'	164	-0.630589	1.20304	15.9602
309070_9	HfPt3	'Pm-3m'	221	-1.10023	1.20786	16.1384
310801_25	ZrPd3	'Pm-3m'	221	-0.800306	1.21525	16.4153
1235098_39	Hg2O	'P-6m2'	187	-1.39029	1.22305	16.7127
552092_45	AlTc2Ir	'I4/mmm'	139	-0.280722	1.22767	16.8917
1103983_62	NbGe	'Pm-3m'	221	-0.714443	1.24447	17.5576
308750_57	MgRh3	'Pm-3m'	221	-0.137622	1.25276	17.8961
511406_158	ZrMnAl2	'P4/mmm'	123	-0.209101	1.25615	18.0366
308624_113	ScRh3	'Pm-3m'	221	-0.560138	1.26208	18.2843
415489_150	Hf2MgTc	'P4/mmm'	123	-0.211185	1.26269	18.3099
314839_38	Ti3Ga	'Pm-3m'	221	-0.220723	1.26868	18.5645
308545_183	Tc3Ni	'Pm-3m'	221	0.054862	1.27048	18.6416
487076_176	Nb2TcPd	'P4/mmm'	123	-0.168205	1.27313	18.7555
1472994_94	Rb2O	'P4_2/mnm'	136	-4.16603	1.28106	19.1013
416004_120	Hf2CdOs	'Pmmm'	47	-0.321092	1.2813	19.1115
558274_185	Zr2SnAs	'P-6m2'	187	-0.664931	1.28396	19.2293
450540_43	AlPdRh2	'P4/mmm'	123	-0.435288	1.28438	19.2479
459799_3	AlMoIr2	'Pmmm'	47	-0.44565	1.29818	19.8691
457891_102	TaIr2Au	'Pmmm'	47	-0.166729	1.31695	20.7469
450505_199	TaPtRh2	'P-1'	2	-0.362893	1.341	21.9279
313078_176	Ti3Al	'Pm-3m'	221	-0.161941	1.34485	22.1235
309977_133	HfRh3	'Pm-3m'	221	-0.705033	1.36026	22.9224
458089_17	ScIr2Rh	'P4/mmm'	123	-0.587368	1.36451	23.1478
312066_30	BeCo3	'P4/mmm'	123	-0.0295437	1.38694	24.3745
450167_144	TaVRh2	'P4/mmm'	123	-0.35202	1.39271	24.7005
1106398_121	AlAg	'Pm-3m'	221	-0.0361936	1.39438	24.796
314740_96	TiRh3	'Pm-3m'	221	-0.53239	1.40666	25.5071
551265_114	AlTc2As	'P-6m2'	187	-0.215919	1.42495	26.6039
310438_199	MoRh3	'Pm-3m'	221	-0.131466	1.4257	26.65
1106788_111	MgGa	'Pm-3m'	221	-0.599774	1.43757	27.3886
512125_27	TaAl2Os	'P3m1'	156	-0.10833	1.44898	28.1175
452211_33	MgAlRh2	'P4/mmm'	123	-0.80267	1.46156	28.9442
487428_61	Nb2AsRu	'Pm'	6	-0.291124	1.46317	29.0518
452338_29	ZrIrRh2	'P4/mmm'	123	-0.652982	1.46974	29.4947
311138_115	Ta3Ir	'P4/mmm'	123	-0.330828	1.49292	31.1114
1103629_184	TaGe	'Pm-3m'	221	-0.717672	1.49435	31.2137
551680_124	ZrTiTc2	'P4/mmm'	123	-0.360028	1.49939	31.5787
414847_18	Hf2MnFe	'P4/mmm'	123	-0.160531	1.5013	31.7176
530598_65	Ta2FeRu	'P4/mmm'	123	-0.153675	1.50948	32.3207
557638_70	Zr2ReRu	'Pmmm'	47	-0.406019	1.51392	32.6527
308862_103	ReRh3	'Pm-3m'	221	0.0432334	1.52703	33.6534
312795_78	Mn3Zn	'P4/mmm'	123	0.257882	1.53507	34.2824
314423_113	IrRh3	'P-6m2'	187	0.0910473	1.53793	34.5087
313070_185	Ta3Ru	'Cmmm'	65	-0.258553	1.55021	35.4983
312864_35	ScAl3	'Pm-3m'	221	-0.452677	1.56021	36.3257
308725_27	ZrRh3	'Pm-3m'	221	-0.628438	1.57935	37.9625
1106465_174	ScPd	'P-6m2'	187	-0.714537	1.58598	38.5461
561609_89	Ti2AlSb	'P4/mmm'	123	-0.0389484	1.60135	39.9346
312974_48	MgOs3	'P-6m2'	187	0.0972311	1.62033	41.719
478931_171	CoB2Ru	'P-6m2'	187	-0.186648	1.6305	42.7072
391801_173	TaV2Tc	'P4/mmm'	123	-0.145108	1.63878	43.5293
531040_104	Ta2CrRu	'Pmmm'	47	-0.247174	1.65504	45.1894
309490_79	Nb3Fe	'P4/mmm'	123	0.0747812	1.6685	46.6119
313754_4	TiCo3	'Pm-3m'	221	-0.200415	1.67098	46.8797
531732_37	Ta2MnV	'P4/mmm'	123	-0.0565189	1.68012	47.876
1104265_60	HfRh	'Pm-3m'	221	-0.229344	1.70558	50.7665
6912_135	CrN	'P-6m2'	187	-3.07275	1.71958	52.4298
415314_114	Hf2BeRe	'P4/mmm'	123	-0.239021	1.75992	57.5339
1105577_167	AlCd	'P-6m2'	187	-3.76883	1.81428	65.2052
21451_120	TcB	'P-6m2'	187	-0.282151	1.83024	67.6451
1239596_63	Na2I	'P-6m2'	187	-3.77188	2.16621	146.626

## Sheet: 123_verified_stable_structures
MAGUS_ID	Formula	Space_group_symbol	Space_group_number	Formation_energy(eV/atom)	LTC_DFT (W/mK)	log(LTC_DFT)	log(LCT_pred)	Heat_capacity_DFT(J/mol/K)	Heat_capacity_pred(J/mol/K)	Cp_DFT_Ratio_to_DP_limit
308725_27	ZrRh3	'Pm-3m'	221	-0.628438	39.251	1.59385	1.57935	95.1103	99.7721	0.953315
312864_35	ScAl3	'Pm-3m'	221	-0.452677	34.664	1.53988	1.56021	89.2777	95.5598	0.894853
309977_133	HfRh3	'Pm-3m'	221	-0.705033	23.187	1.36524	1.36026	95.5145	100.227	0.957366
365365_52	ZrIrPt2	'P4/mmm'	123	-0.89732	18.2197	1.26054	0.999581	96.0376	100.461	0.962609
314423_113	IrRh3	'P-6m2'	187	0.0910473	17.706	1.24812	1.53793	94.8379	100.809	0.950584
310801_25	ZrPd3	'Pm-3m'	221	-0.800306	17.188	1.23523	1.21525	95.8262	100.242	0.960491
309070_9	HfPt3	'Pm-3m'	221	-1.10023	15.256	1.18344	1.20786	97.0385	100.912	0.972641
463240_154	ZrPd2Pt	'P4/mmm'	123	-0.893818	13.4807	1.12971	1.06042	95.9656	100.342	0.961887
1455393_50	LiCaAs	'P2_1/m'	11	-1.0394	11.925	1.07646	0.49141	135.639	138.872	0.906365
312951_65	ScPt3	'Pm-3m'	221	-1.05212	10.919	1.03818	1.05035	95.4768	99.7135	0.956988
308787_141	ZrPt3	'Pm-3m'	221	-1.02073	10.527	1.0223	1.07535	96.4948	100.591	0.967192
899114_86	HfVPd2	'P4/mmm'	123	-0.347657	10.2671	1.01145	0.890599	95.82	100.8	0.960428
365679_94	TiPt2Rh	'P4/mmm'	123	-0.769513	10.1914	1.00823	0.782919	95.0884	99.5725	0.953095
1332607_100	Li3NbO4	'P-43m'	215	-3.56256	10.135	1.00582	1.09537	148.471	153.312	0.744083
365337_88	ScPdPt2	'P4/mmm'	123	-0.989026	9.00577	0.954521	0.931308	95.5696	99.6082	0.957918
314884_94	YPt3	'Pm-3m'	221	-0.981301	8.3626	0.922341	0.924486	96.7078	100.298	0.969327
309716_82	SnRh3	'Pm-3m'	221	-0.192521	8.2735	0.917689	0.977398	95.8893	99.8092	0.961122
310770_60	HfAl3	'Pm-3m'	221	-0.364921	8.1236	0.909749	1.17986	90.3699	96.9263	0.9058
310344_63	TiPd3	'Pm-3m'	221	-0.595331	7.9466	0.900181	0.7635	95.2874	99.3166	0.95509
1414094_72	LiMgP	'P4/nmm'	129	-0.661273	7.6221	0.882075	0.783013	131.05	132.911	0.875698
1710474_87	CaZrO3	'P-1'	2	-4.70657	7.58283	0.879832	0.93672	199.764	212.342	0.800915
310690_11	CdPd3	'Pm-3m'	221	-0.24994	7.4617	0.872838	0.8703	96.5494	100.185	0.96774
313822_181	ScPd3	'Pm-3m'	221	-0.859707	7.0908	0.850695	0.871077	95.7707	99.4419	0.959934
308467_121	YPd3	'Pm-3m'	221	-0.865267	7.011	0.84578	0.882933	96.731	100.058	0.96956
363974_72	YPt2Au	'P4/mmm'	123	-0.891818	6.8933	0.838427	0.689617	97.0293	100.244	0.972549
511601_6	ScAl2Cd	'P4/mmm'	123	-0.331494	6.803	0.8327	0.887952	92.8045	97.4387	0.930204
1455693_52	LiCaSb	'P4/nmm'	129	-0.917423	6.51383	0.813837	0.565369	138.129	139.325	0.922999
310830_1	YRh3	'Pm-3m'	221	-0.418435	6.3742	0.804426	1.01406	96.0142	99.7261	0.962375
310429_178	TiPt3	'Pm-3m'	221	-0.807282	5.8541	0.76746	0.778703	96.0721	99.566	0.962955
1647888_4	Sr2SeS	'P-1'	2	-2.10114	5.7875	0.762491	0.406232	192.463	195.394	0.964551
312328_174	MgPd3	'Pm-3m'	221	-0.475619	5.5559	0.744754	0.743938	94.9111	99.0582	0.951318
1103970_69	ZrRh	'Pm-3m'	221	-0.35526	5.2798	0.722617	0.658872	48.6977	51.4415	0.976219
308687_7	InPd3	'Pm-3m'	221	-0.436384	5.1589	0.712557	0.728908	96.7035	100.255	0.969284
309499_55	NbPd3	'Pm-3m'	221	-0.281304	4.8919	0.689478	1.04398	96.5254	100.749	0.967498
1441709_82	NaCrO2	'P6_3/mmc'	194	-1.97693	4.34293	0.637783	0.18587	96.5057	95.1086	0.967301
308783_177	CdPt3	'Pm-3m'	221	-0.182726	4.3081	0.634286	0.65221	97.1486	100.439	0.973745
516033_72	YRhAu2	'P4/mmm'	123	-0.650299	4.22837	0.626173	0.337103	97.046	100.03	0.972717
1283318_17	NaLiSe	'P4/nmm'	129	-1.12345	4.20143	0.623397	0.296546	137.267	141.011	0.917241
313873_43	CaPb3	'Pm-3m'	221	-0.328282	4.0308	0.605391	0.614475	98.5031	100.23	0.987321
485871_69	SrHfSb2	'P-3m1'	164	-0.701434	3.92013	0.593301	0.82556	97.5637	101.81	0.977905
484869_175	CaHfSb2	'P-1'	2	-0.725149	3.76533	0.575803	0.913902	96.7063	100.127	0.969311
309498_103	IrPd3	'P-6m2'	187	0.0662293	3.7437	0.573301	0.953852	95.7626	101.397	0.959853
313452_156	LiY3	'C2/m'	12	0.0667103	3.71327	0.569756	1.16724	94.7963	98.3876	0.950168
308939_100	Pd3Pb	'Pm-3m'	221	-0.307027	3.6519	0.562519	0.566216	97.3603	100.402	0.975867
364462_91	InNiPt2	'P4/mmm'	123	-0.24648	3.52593	0.547274	0.33977	96.5875	100.584	0.968121
310468_149	InPt3	'Pm-3m'	221	-0.364561	3.3092	0.519723	0.52304	97.2529	100.518	0.97479
1472864_11	Sc2Te3	'P6_3/mcm'	193	-1.19802	3.24127	0.510715	0.853469	240.556	232.094	0.96446
463270_167	Pd2PtPb	'P4/mmm'	123	-0.244985	3.1434	0.4974	0.398377	97.5625	100.471	0.977894
311765_44	ScIn3	'Pm-3m'	221	-0.288566	3.0581	0.485452	0.598382	97.4223	99.7391	0.976488
309755_135	TlPd3	'P4/mmm'	123	-0.191807	3.0436	0.483388	0.54695	97.2966	100.474	0.975229
492686_49	ScTiSn2	'P4/mmm'	123	-0.30419	2.8719	0.458169	0.552816	95.9448	98.4942	0.961679
545947_105	CaNiBi2	'P-3m1'	164	-0.328608	2.80787	0.448376	0.704382	97.0447	101.808	0.972704
314533_154	NaAu3	'Pm-3m'	221	-0.1938	2.6749	0.427308	0.420428	96.7694	99.3824	0.969944
1490674_77	PtF3	'P6_3/mmc'	194	-0.528944	2.6572	0.424424	0.265823	145.988	141.194	0.975519
364175_164	LiPt2Pb	'P4/mmm'	123	-0.375259	2.6483	0.422967	0.348282	94.3823	98.2568	0.946018
515810_43	CdPdAu2	'P4/mmm'	123	-0.265159	2.6013	0.41519	0.222348	97.7262	100.162	0.979535
311310_153	Ca3Y	'P4/mmm'	123	0.130977	2.4162	0.383133	0.706161	97.1084	96.4415	0.973343
1446961_31	BaLiP	'P4/nmm'	129	-1.01868	2.3508	0.371216	0.366485	143.634	136.152	0.959785
371322_34	YTl2In	'P4/mmm'	123	-0.280818	2.22803	0.347922	0.0885474	98.4791	100.41	0.987081
308890_145	TaPt3	'Pm-3m'	221	-0.540378	2.1677	0.335999	0.932245	97.7192	101.86	0.979465
1441277_51	MgSnAu	'C2/m'	12	-2.87092	2.0843	0.31896	0.112058	72.3368	76.5186	0.966734
486592_71	YGaSb2	'P-3m1'	164	-0.452358	2.04287	0.31024	0.657818	97.4406	101.987	0.976672
443142_28	NaCa2Ga	'P4/mmm'	123	-0.213743	2.03002	0.3075	0.302847	96.9032	95.008	0.971285
312610_45	CaIn3	'Pm-3m'	221	-0.313263	1.8042	0.256285	0.259749	97.7639	99.7877	0.979913
309504_13	LiAu3	'Pm-3m'	221	-0.366241	1.7976	0.254693	0.253899	95.1473	98.3201	0.953686
1106828_18	ZrAu	'P-6m2'	187	0.0778989	1.79737	0.254637	0.344579	49.0665	53.4788	0.983612
379155_177	YBiAs2	'P-3m1'	164	-0.661606	1.79543	0.254169	1.16841	97.1828	102.713	0.974088
313161_167	YTl3	'Pm-3m'	221	-0.233741	1.7799	0.250396	0.269974	98.7352	100.401	0.989647
1561087_1	CsLiTe	'Pmmn'	59	-0.655949	1.73297	0.23879	0.0893863	143.449	137.127	0.958554
1106177_156	TiBi	'Pm-3m'	221	-0.329518	1.5978	0.203522	0.117471	49.3116	52.721	0.988526
453343_147	YIn2Bi	'P4/mmm'	123	-0.412875	1.5121	0.179581	0.151615	98.4355	100.322	0.986644
454575_137	ScIn2Pb	'P4/mmm'	123	-0.216028	1.47377	0.168429	0.223017	98.0507	99.9036	0.982787
310222_80	CaBi3	'Pm-3m'	221	-0.502178	1.4708	0.167554	0.225815	98.7256	100.226	0.989552
310967_16	CaSn3	'P6/mmm'	191	-0.289057	1.46651	0.166284	0.660071	98.0028	101.341	0.982307
1440232_30	SrCl2	'P6_3/mmc'	194	-1.48394	1.3542	0.131683	0.24288	97.4644	100.31	0.976911
1103750_190	CaCd	'Pmmm'	47	-0.0239101	1.25102	0.0972654	0.252806	48.883	51.1565	0.979934
554473_29	KCd2Au	'P-3m1'	164	-0.193499	1.17237	0.0690635	-0.232877	98.202	101.125	0.984303
410192_183	CaY2Pd	'Pmmm'	47	-0.371169	1.17137	0.0686941	0.365703	97.582	97.4986	0.978089
928574_188	CaYAsO	'P-3m1'	164	-0.456027	1.08316	0.034694	-0.174092	98.5906	102.38	0.988199
314599_166	MgAu3	'Pm-3m'	221	-0.380257	1.0827	0.0345081	0.155337	97.0276	99.0997	0.972532
546287_12	CaTlBi2	'P4/mmm'	123	-0.471854	1.0778	0.0325382	0.0152247	98.7321	100.502	0.989617
486527_21	NaHfSb2	'P-3m1'	164	-0.361181	1.0537	0.0227184	0.637615	97.2298	99.5707	0.974559
468937_47	BiPd2Pt	'P4/mmm'	123	-0.20358	1.0025	0.00108583	0.0939388	98.114	100.418	0.983421
397398_186	LiTe2Pb	'P-3m1'	164	-0.464971	0.993823	-0.00269081	0.305025	96.91	100.564	0.971353
398306_98	YTlTe2	'P-3m1'	164	-1.04602	0.96706	-0.0145466	0.104945	98.2256	98.985	0.98454
497332_6	SrZrPb2	'P2/m'	10	-0.246309	0.963473	-0.0161603	0.173011	98.3021	101.601	0.985307
310373_80	OsPd3	'P-6m2'	187	0.125057	0.95315	-0.0208387	1.04211	95.7412	101.082	0.959639
311498_121	LiPb3	'Pm-3m'	221	-0.13392	0.94126	-0.0262904	0.0184262	98.237	99.9267	0.984654
336983_49	NaI	'P-6m2'	187	-1.20131	0.905307	-0.0432043	-0.118587	49.2019	51.8966	0.986326
1238921_88	SrI2	'Fm-3m'	225	-1.8091	0.80492	-0.0942473	0.394071	74.2545	74.1614	0.992362
497976_169	NaInPb2	'Pmmm'	47	-0.0934351	0.74348	-0.128731	-0.150243	98.4541	101.101	0.98683
499515_125	LiBiPb2	'P4/mmm'	123	-0.192194	0.741167	-0.130084	-0.210922	98.393	99.1376	0.986218
414900_165	Hf2InGa	'P4/mmm'	123	-0.286663	0.663393	-0.178229	1.02199	96.6749	101.372	0.968997
310741_200	Na3In	'C2/m'	12	-0.0339012	0.655383	-0.183505	-0.287255	97.7117	100.263	0.979389
94044_78	PbIF	'P4/nmm'	129	-1.83047	0.653443	-0.184792	-0.0709442	145.625	132.4	0.973089
308064_41	TaAu3	'P4/mmm'	123	-0.0554896	0.62796	-0.202068	0.515964	97.8864	101.288	0.981141
370860_33	BaTl2In	'P-1'	2	-0.306178	0.54775	-0.261418	-0.42817	98.9085	100.713	0.991385
553670_9	SrCd2Pt	'P4mm'	99	-0.357106	0.518387	-0.285346	-0.0127132	98.3447	102.489	0.985734
543881_124	Sr2AgHg	'P4/mmm'	123	-0.400354	0.487787	-0.31177	-0.179689	98.7067	100.856	0.989362
312974_48	MgOs3	'P-6m2'	187	0.0972311	0.477055	-0.321431	1.62033	92.5551	100.657	0.927704
543769_96	Sr2TlPd	'P-3m1'	164	-0.425894	0.45746	-0.339647	-0.358314	98.345	101.533	0.985736
313365_74	LiTl3	'P2/m'	10	-0.0795109	0.377127	-0.423513	1.02339	97.2998	98.0718	0.97526
515403_178	BaCdAu2	'P-1'	2	-0.559589	0.344543	-0.462756	-0.419064	98.6705	102.123	0.988999
1474182_88	Zn2SeS	'P6_3/mmc'	194	-0.64435	0.318883	-0.496368	-0.955554	99.4197	91.9641	0.996509
398862_77	NaMgTe2	'P-3m1'	164	-0.658947	0.30489	-0.515857	0.25598	97.0616	98.8937	0.972873
547081_7	SrBi2Rh	'P-1'	2	-0.494531	0.29758	-0.526396	0.425942	97.8555	101.705	0.980831
1728126_12	K2TlBiCl6	'P-31m'	162	-1.98815	0.27882	-0.554676	-0.146309	242.938	242.031	0.97401
363252_163	TaPt2Au	'P2/m'	10	-0.445709	0.244186	-0.612279	0.926741	97.2558	101.695	0.974819
454850_67	BaIn2Pt	'P4mm'	99	-0.401051	0.243057	-0.614292	0.0970527	98.4985	102.511	0.987275
528584_194	HfNi2Sb	'P-6m2'	187	-0.3597	0.202457	-0.693668	0.457372	94.908	100.318	0.951287
416611_76	Hf2CdAu	'P-1'	2	-0.198191	0.177293	-0.751308	0.665671	97.9752	101.493	0.98203
364867_26	BaPt2Pb	'C2/m'	12	-0.478782	0.176063	-0.754331	-0.199884	98.4642	102.56	0.986931
556722_95	Zr2CdPd	'Pmmm'	47	-0.332452	0.169018	-0.772066	0.604278	97.0724	100.835	0.972981
314157_46	RhAu3	'P-3m1'	164	0.138769	0.150373	-0.822829	0.52426	97.7346	101.711	0.979619
366093_26	Na2InPb	'P4/mmm'	123	-0.0974994	0.126667	-0.897335	-0.0465734	97.8795	82.313	0.981071
310641_35	In3Au	'P-3m1'	164	-0.0839971	0.121343	-0.915984	0.181849	98.4044	102.095	0.986333
498017_113	YMgPb2	'P-1'	2	-0.205828	0.114363	-0.941716	0.210106	97.9031	97.1786	0.981307
1548987_90	K2YTlBr6	'P-3'	147	-1.67237	0.0959543	-1.01794	-0.205188	245.111	249.779	0.982725
556020_129	Zr2TlGa	'P4/mmm'	123	-0.316589	0.0764347	-1.11671	0.792911	96.1569	100.926	0.963805
417436_166	Ba2LiAu	'P-1'	2	-0.35969	0.057321	-1.24169	-0.346586	96.2688	100.208	0.964926
314264_194	Ag3Ge	'Amm2'	38	0.113334	0.0285023	-1.54512	0.121612	97.9828	101.616	0.982107
556148_172	Zr2AlHg	'Pmmm'	47	-0.335026	0.019022	-1.72074	0.852256	94.3572	99.8249	0.945766
313102_65	Mg3Zn	'P4/mmm'	123	0.0153565	0.001595	-2.79724	0.739647	94.7858	98.2934	0.950063
